# Supplementary material for: Heterogeneity in fetal growth velocity
Source: PubMed Central journal article supplement (PMC6683115; doi:10.1038/s41598-019-47839-5), 2019-08-05
Supplement: 41598_2019_47839_MOESM1_ESM.pdf [file 41598_2019_47839_MOESM1_ESM.pdf]

# **Heterogeneity in fetal growth velocity**

Noriko SATO and Naoyuki MIYASAKA.

## **Supplementary information**

Table S1. Summary statistics of estimated fetal weight (EFW) (n = 801)

Table S2. Heterogeneity detection of growth trajectory is not due to the inter-observer variability

Figure S1. Estimated fetal weight curves of all the fetuses analyzed

Figure S2. Effects of maternal age on the trajectories in standardized scores (z-scores) of fetal anthropometric values during gestation

Figure S3. Estimated mean trajectories of estimated fetal weight (EFW) velocity for the mothers without metabolic and hypertensive diseases during gestation

Figure S4. Estimated mean trajectories of estimated fetal weight (EFW) velocity for the mothers without preterm birth.

Figure S5. Estimated mean trajectories of estimated fetal weight (EFW) velocity for the mothers without pathological risks of low birth weight (smoking during gestation, poor obstetrics history, and complications)

Figure S6. Mean trajectories of identified classes for fetal growth velocity, weekly fetal size, and standardized scores (z-scores) of fetal anthropometric values

Figure S7. The relevance of identified growth velocity class and fetal body proportion

Figure S8. Mean trajectories of identified classes for maternal weight gain.

Figure S9. Preliminary investigation for the involvement of velocity variation in birth outcome.

**Table S1. Summary statistics of estimated fetal weight (EFW) (N = 801)**

| Week of gestational age | Number of missing values | <i>P</i> value for normality test <sup>a</sup> | Mean of subjects (g) | SD of subjects (g) | Japanese standard (mean, g) |
|-------------------------|--------------------------|------------------------------------------------|----------------------|--------------------|-----------------------------|
| 15                      | 617                      | 0.122                                          | 73                   | 14                 | NA <sup>b</sup>             |
| 16                      | 508                      | 0.178                                          | 107                  | 18                 | NA <sup>b</sup>             |
| 17                      | 388                      | 0.143                                          | 147                  | 22                 | NA <sup>b</sup>             |
| 18                      | 287                      | 0.378                                          | 196                  | 26                 | 187                         |
| 19                      | 166                      | 0.293                                          | 253                  | 31                 | 247                         |
| 20                      | 68                       | 0.359                                          | 319                  | 37                 | 313                         |
| 21                      | 0                        | 0.607                                          | 391                  | 42                 | 387                         |
| 22                      | 0                        | 0.829                                          | 472                  | 49                 | 469                         |
| 23                      | 0                        | 0.669                                          | 564                  | 56                 | 560                         |
| 24                      | 0                        | 0.682                                          | 666                  | 64                 | 660                         |
| 25                      | 0                        | 0.411                                          | 779                  | 74                 | 771                         |
| 26                      | 0                        | 0.140                                          | 904                  | 85                 | 892                         |
| 27                      | 0                        | 0.241                                          | 1039                 | 95                 | 1023                        |
| 28                      | 0                        | 0.214                                          | 1183                 | 106                | 1163                        |
| 29                      | 0                        | 0.135                                          | 1335                 | 117                | 1313                        |
| 30                      | 1                        | 0.132                                          | 1494                 | 128                | 1470                        |
| 31                      | 1                        | 0.364                                          | 1658                 | 140                | 1635                        |
| 32                      | 1                        | 0.393                                          | 1825                 | 156                | 1805                        |
| 33                      | 2                        | 0.272                                          | 1995                 | 172                | 1980                        |
| 34                      | 6                        | 0.006                                          | 2167                 | 186                | 2156                        |
| 35                      | 11                       | 0.012                                          | 2339                 | 200                | 2333                        |
| 36                      | 20                       | 0.040                                          | 2510                 | 216                | 2507                        |
| 37                      | 39                       | 0.052                                          | 2682                 | 235                | 2676                        |
| 38                      | 126                      | 0.383                                          | 2850                 | 249                | 2838                        |
| 39                      | 312                      | 0.140                                          | 3005                 | 247                | 2989                        |
| 40                      | 524                      | 0.042                                          | 3135                 | 257                | 3125                        |
| 41                      | 719                      | 0.834                                          | 3263                 | 294                | 3244                        |

<sup>a</sup>Shapiro-Wilk test; <sup>b</sup>Not described in Okai T. Standard values of ultrasonic measurements in Japanese fetuses. J Med Ultrasonic. 2003;30:J415-440 (Japanese).

**Table S2. Heterogeneity detection of growth trajectory is not due to the inter-observer variability**

Breakdown of doctors-in-charge and fetal growth velocity classification (n = 801)

|               | Class 1 | Class 2 | Class 3 |
|---------------|---------|---------|---------|
| Doctor A      | 42      | 158     | 17      |
| Doctor B      | 34      | 177     | 27      |
| Doctor C      | 15      | 81      | 20      |
| Other doctors | 27      | 176     | 27      |

The probability of class distribution was not affected by the observers (doctors),  $\chi^2(6) = 11.3$ ,  $p = 0.08$ .

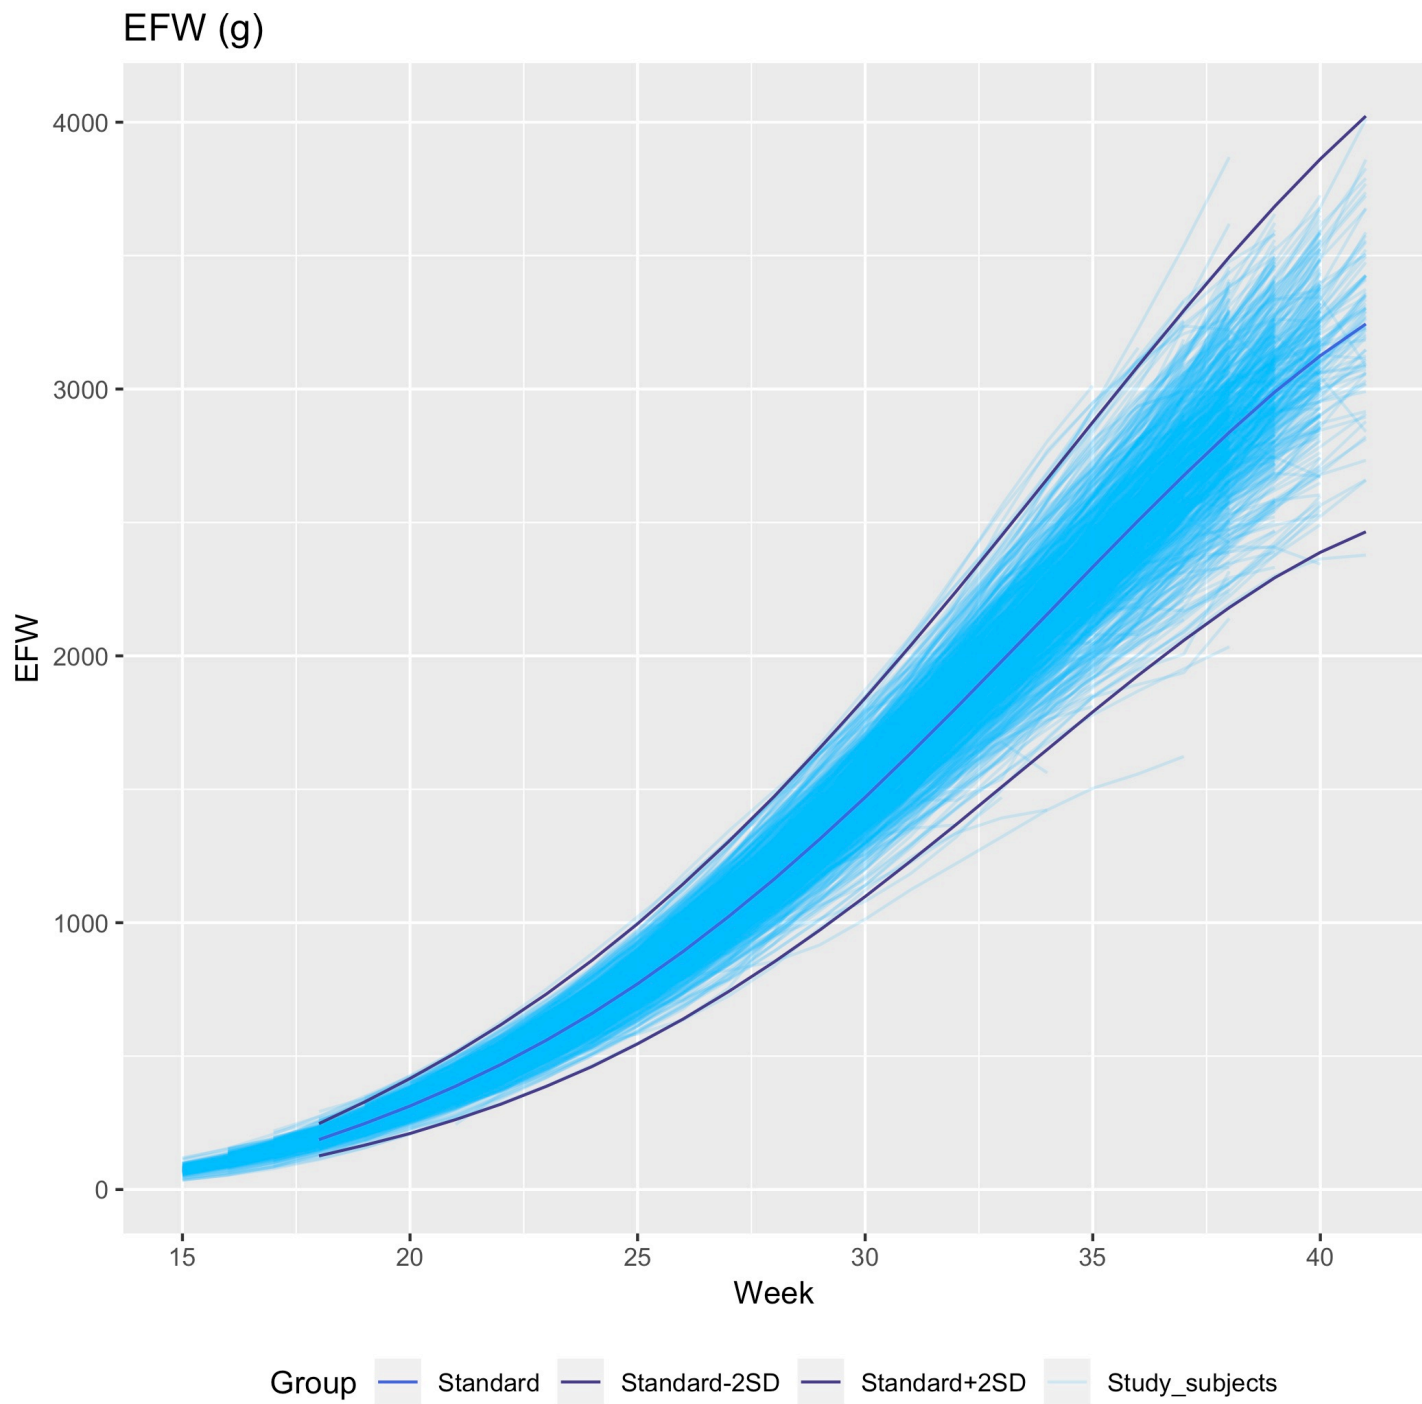

**Figure S1. The estimated fetal weight curves of all the subjects in our study**

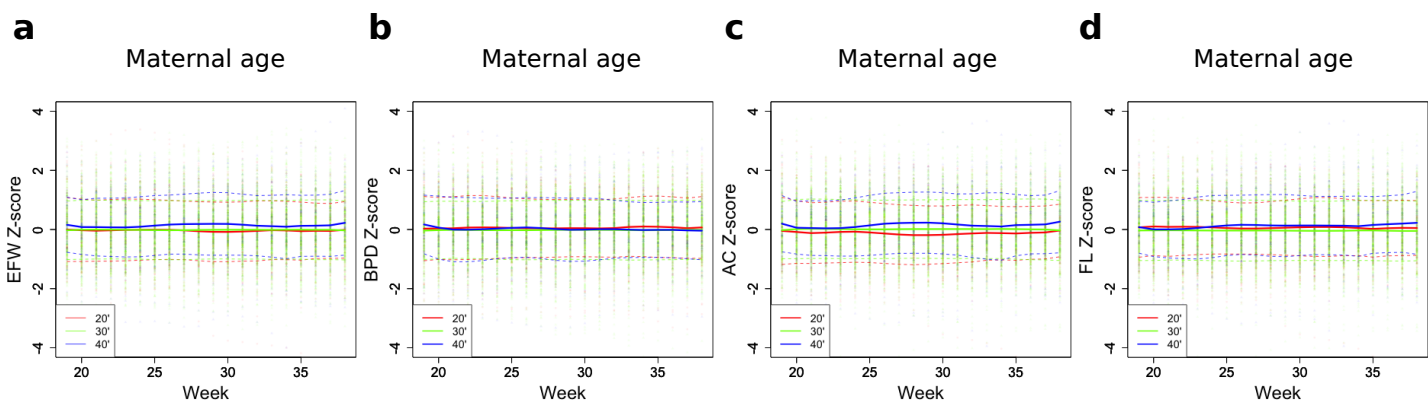

**Figure S2. Effects of maternal age on the trajectories in standardized scores (z-scores) of fetal anthropometric values during gestation**

Changes in fetal anthropometric standardized scores (z-scores) of subgroups classified by maternal age. Color codes distinct subgroup indicated in the left-bottom. All weakly values (dots) with mean (solid lines) and  $\pm 1$  SD (dashed lines) of z-scores are shown. EFW, estimated fetal weight; BPD, biparietal diameter; FL, femur length; AC, abdominal circumference

### a. EFW velocity

(no metabolic and hypertensive diseases during gestation)

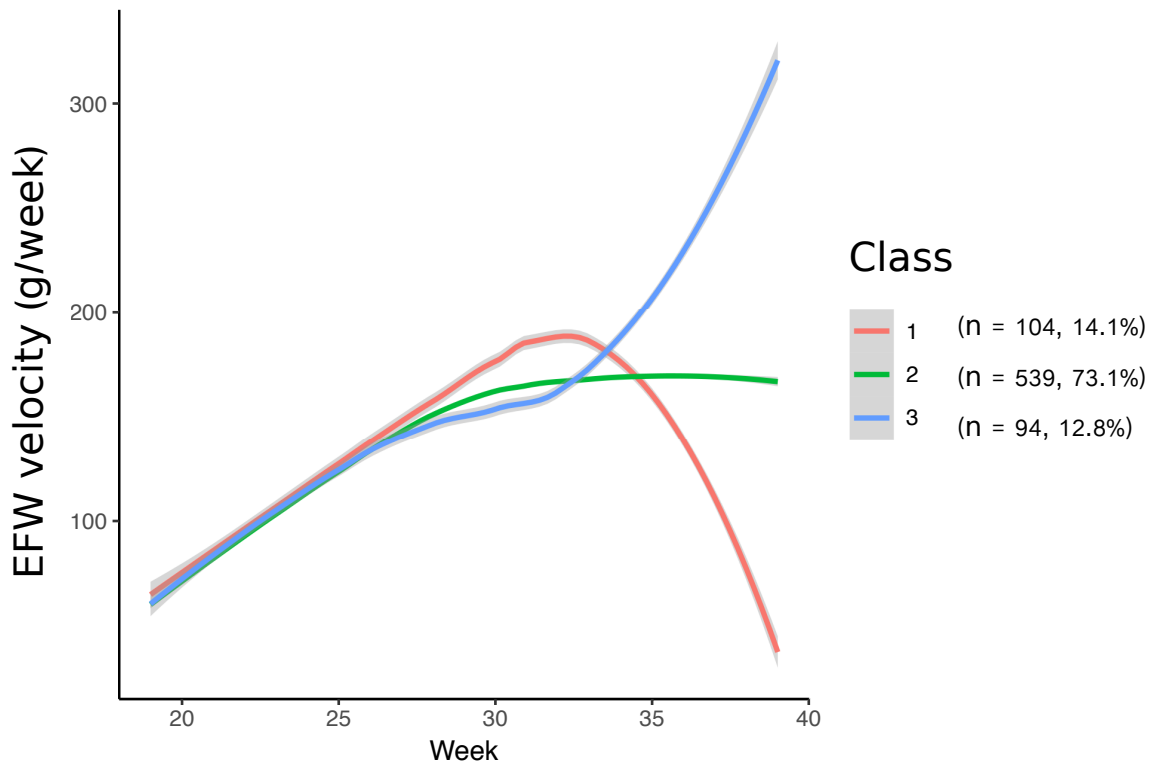

### b. Average class probabilities by latent classes

| Latent class | Mean of Posterior Probabilities |         |         |
|--------------|---------------------------------|---------|---------|
|              | Class 1                         | Class 2 | Class 3 |
| Class 1      | 0.946                           | 0.055   | 0.000   |
| Class 2      | 0.029                           | 0.941   | 0.030   |
| Class 3      | 0.001                           | 0.085   | 0.914   |

**Figure S3. Estimated mean trajectories of estimated fetal weight (EFW) velocity for the mothers without metabolic and hypertensive diseases during gestation (n = 737).**

a. Metabolic and hypertensive diseases include thyroid disease, glucose metabolism disorder and hypertensive disorder of pregnancy. Latent class trajectory analysis identified three distinct trajectories for EFW velocity. Separate colors indicate different classes. b. The levels of the mean posterior probability of class membership for individuals are high (> 91%) as shown.

a. EFW velocity  
(no preterm birth)

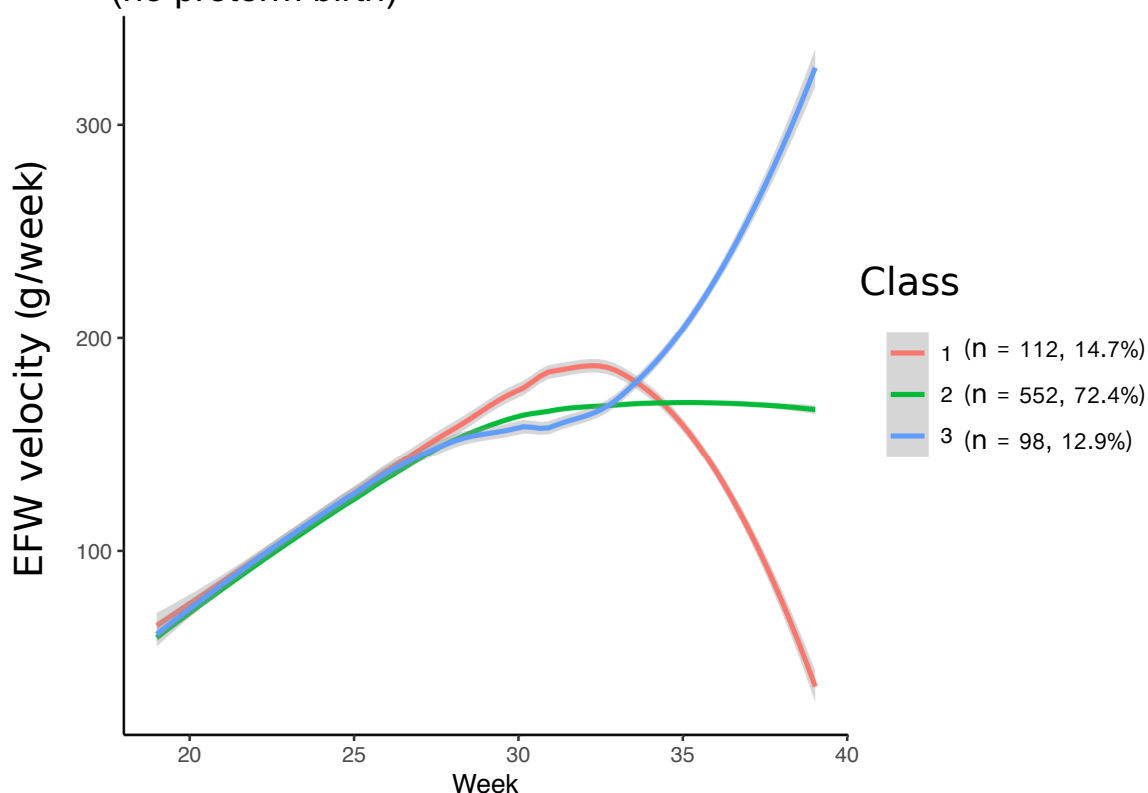

b. Average class probabilities by latent classes

| Latent class | Mean of Posterior Probabilities |         |         |
|--------------|---------------------------------|---------|---------|
|              | Class 1                         | Class 2 | Class 3 |
| Class 1      | 0.948                           | 0.052   | 0.000   |
| Class 2      | 0.023                           | 0.957   | 0.020   |
| Class 3      | 0.000                           | 0.086   | 0.914   |

**Figure S4. Estimated mean trajectories of estimated fetal weight (EFW) velocity for the mothers without preterm birth (n = 762).**

a. Latent class trajectory analysis identified three distinct trajectories for EFW velocity. Separate colors indicate different classes. b. The levels of the mean posterior probability of class membership for individuals are high (> 91%) as shown.

### a. EFW velocity

(no smoking, poor obstetrics history and complications)

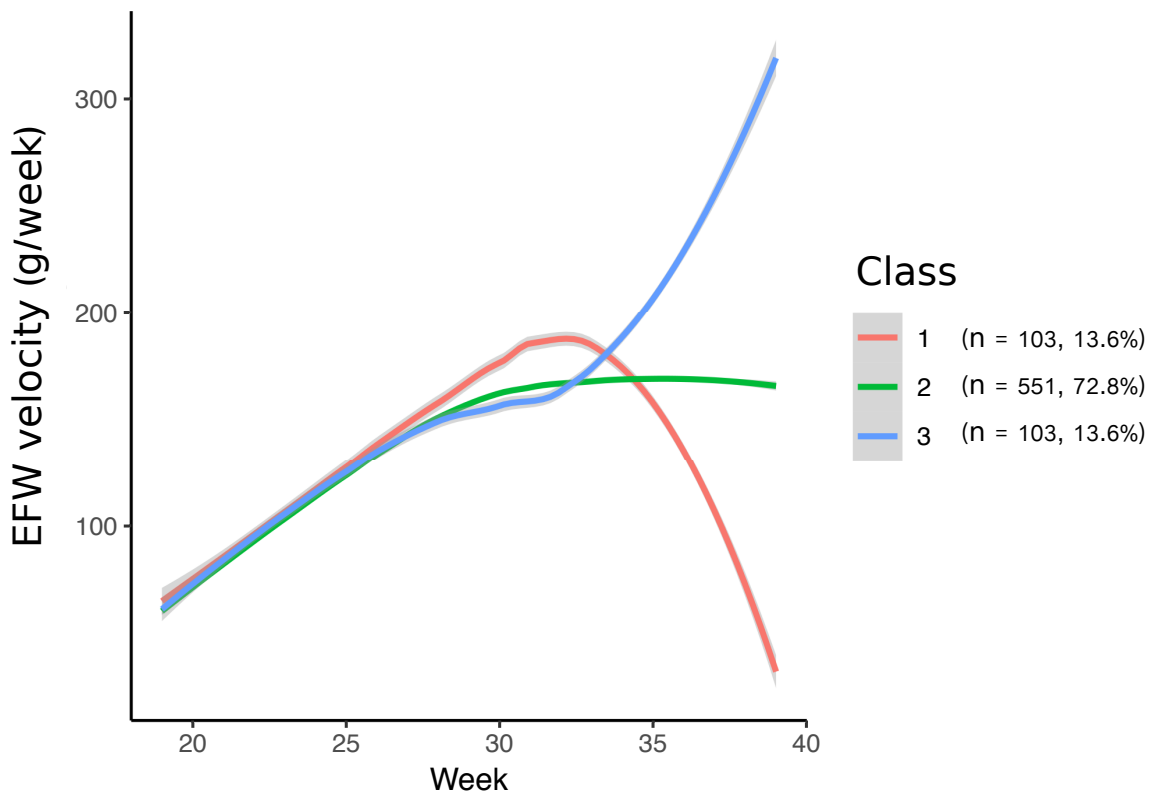

### b. Average class probabilities by latent classes

| Latent class | Mean of Posterior Probabilities |         |         |
|--------------|---------------------------------|---------|---------|
|              | Class 1                         | Class 2 | Class 3 |
| Class 1      | 0.954                           | 0.046   | 0.000   |
| Class 2      | 0.028                           | 0.947   | 0.026   |
| Class 3      | 0.001                           | 0.096   | 0.904   |

**Figure S5. Estimated mean trajectories of estimated fetal weight (EFW) velocity for the mothers without pathological risks of low birth weight (smoking during gestation, poor obstetrics history and complications) (n = 757).**

a. Latent class trajectory analysis identified three distinct trajectories for EFW velocity. Separate colors indicate different classes. b. The levels of the mean posterior probability of class membership for individuals are high (> 90%) as shown.



**EFW****BPD****AC****FL****Velocity****a**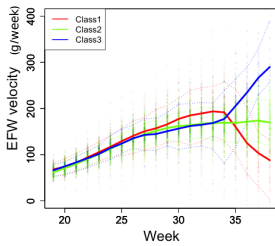**b**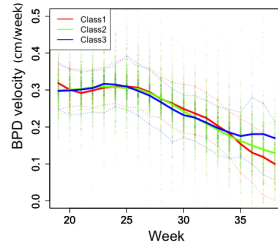**c**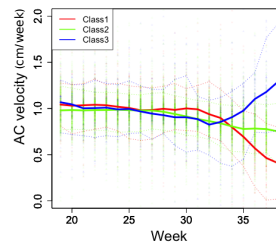**d**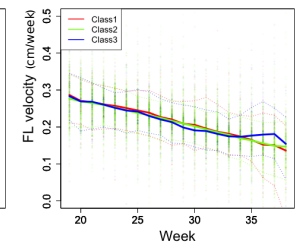**Velocity z-score****e**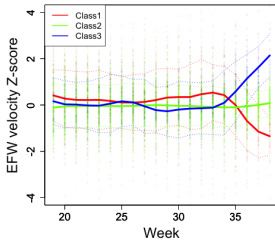**f**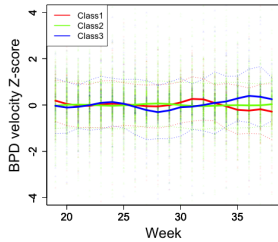**g**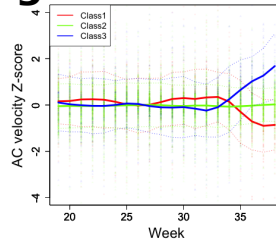**h**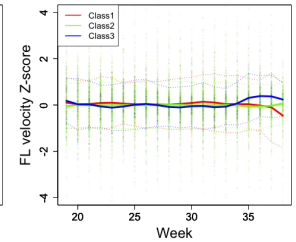**Size****i**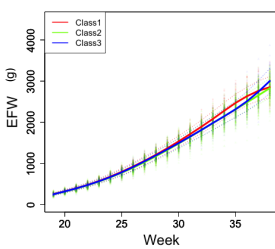**j**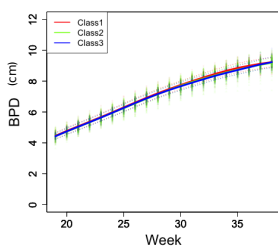**k**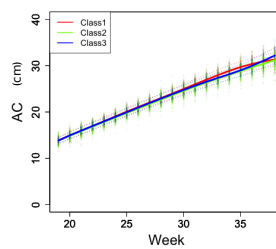**l**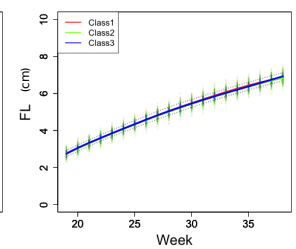**Size z-score****m**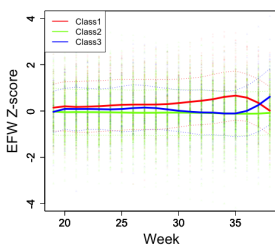**n**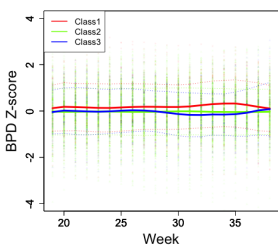**o**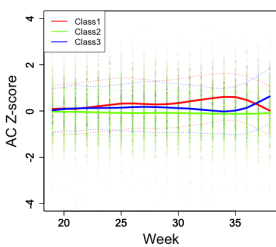**p**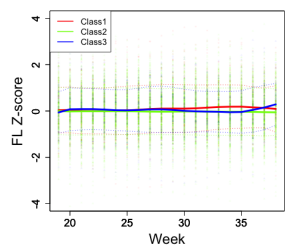

**Figure S6. Mean trajectories of identified classes for fetal growth velocity, weekly fetal size, and their standardized scores (z-scores) of fetal anthropometric values**

Color codes identified class indicated in the top-left. All weekly values (dots) with median (solid lines) and 10<sup>th</sup>/90<sup>th</sup> (dashed lines) for **a-d**, with mean (solid lines) and  $\pm 1$  SD (dashed lines) for **e-p** are shown. EFW, estimated fetal weight; BPD, biparietal diameter; FL, femur length; AC, abdominal circumference

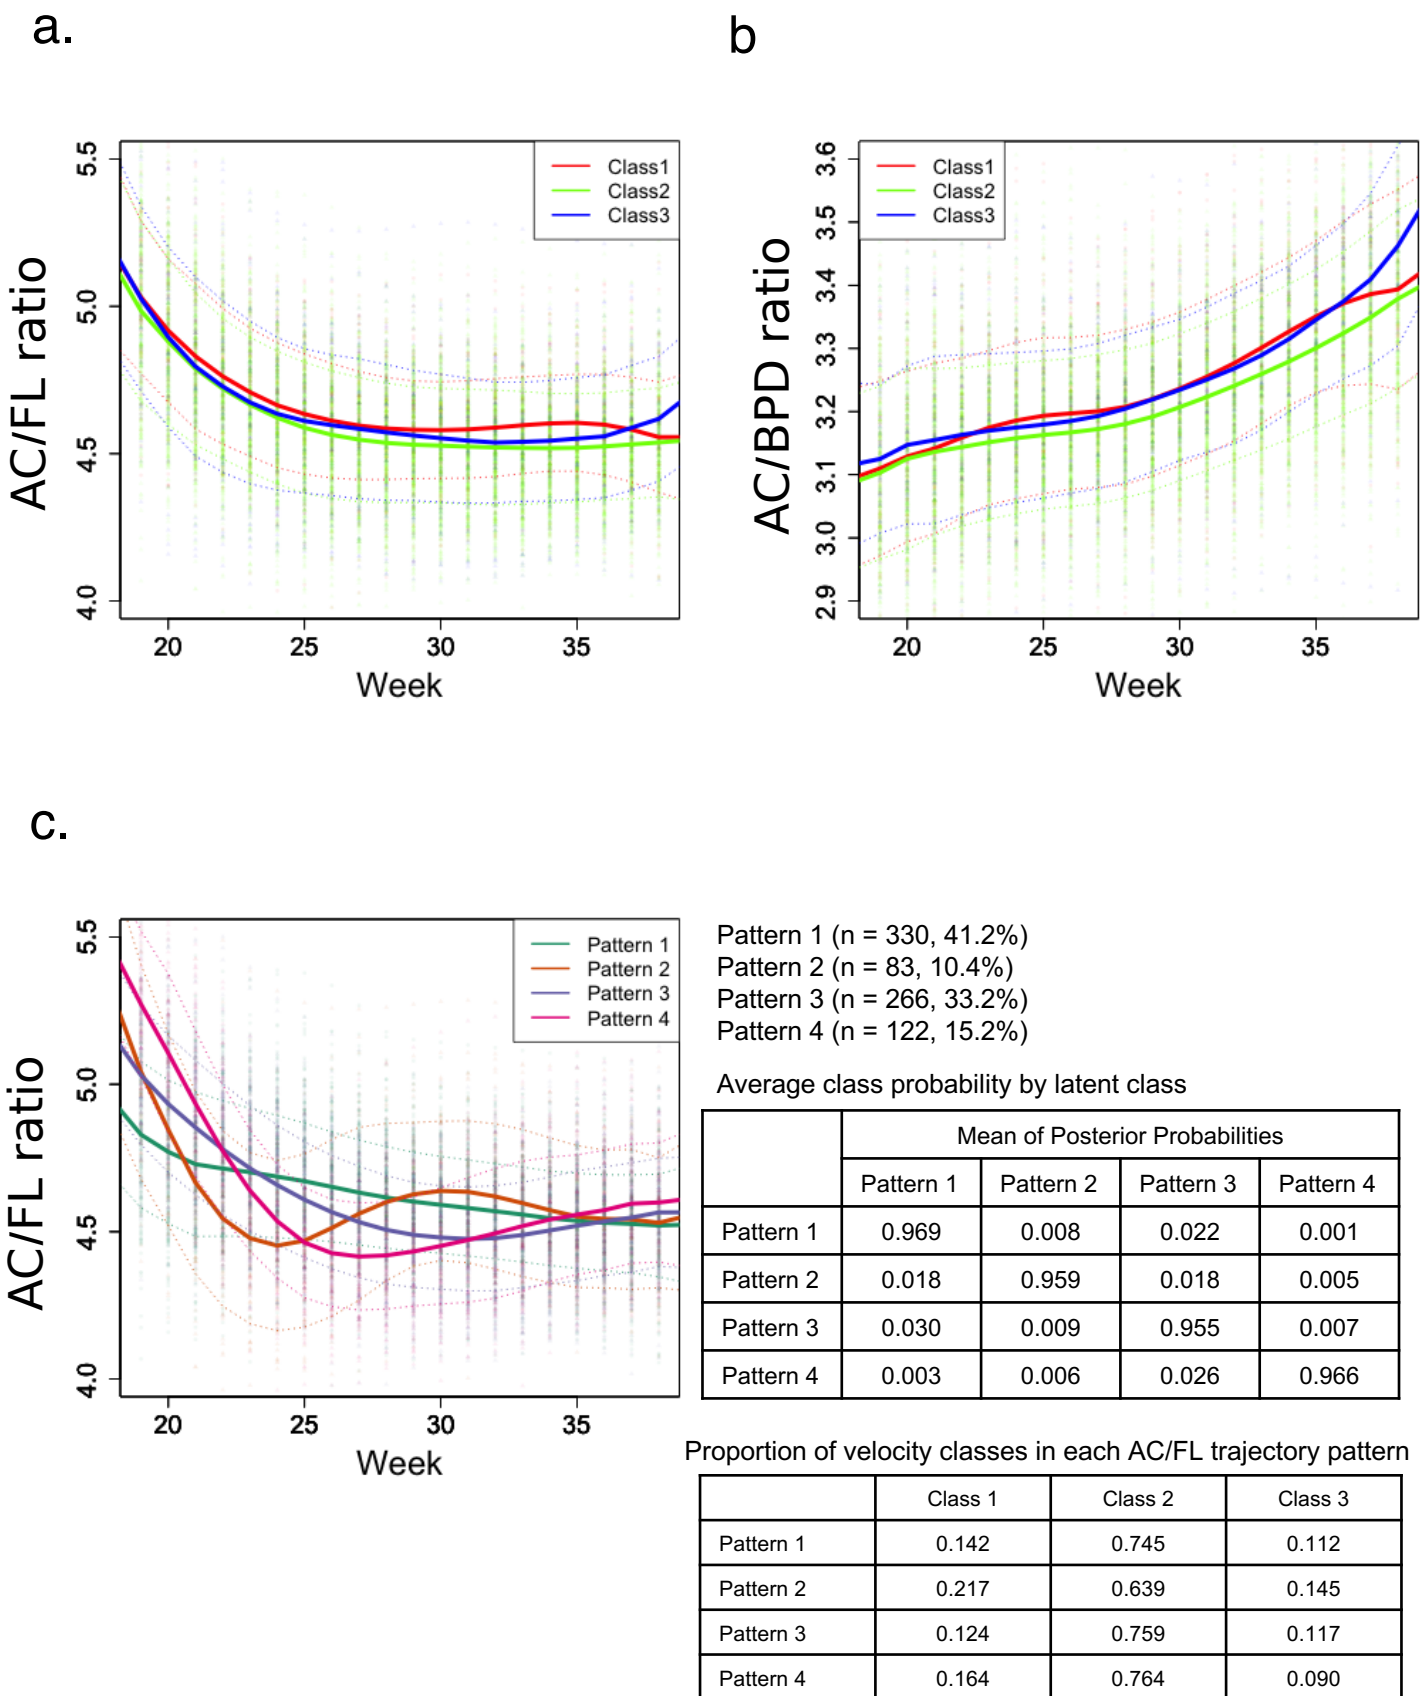

**Figure S7. The relevance of identified growth velocity class and fetal body proportion.** Mean trajectory of identified velocity trajectory classes for AC/FL ratio (a) and AC/BPD ratio (b). Mean trajectory of identified AC/FL ratio trajectory patterns by latent class trajectory analysis of AC/FL ratio (c). All weekly values (dot) with mean (solid lines) and  $\pm 1$  SD (dashed lines). Color codes identified class or pattern indicated in the top. BPD, biparietal diameter; FL, femur length; AC, abdominal circumference.

a.

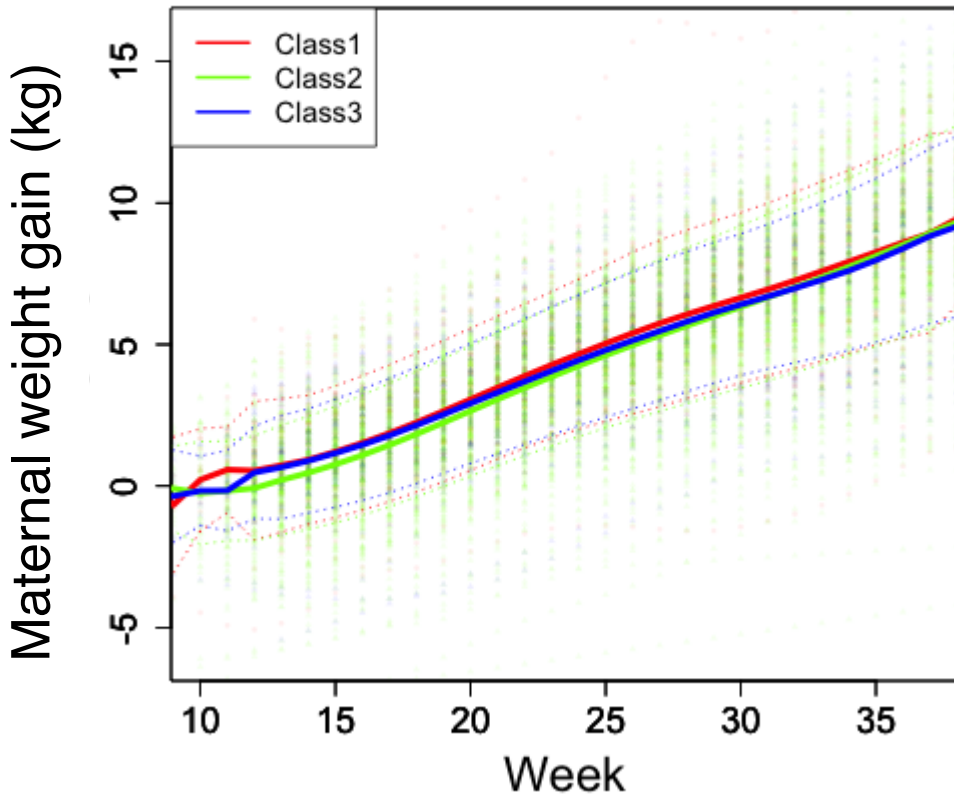

b.

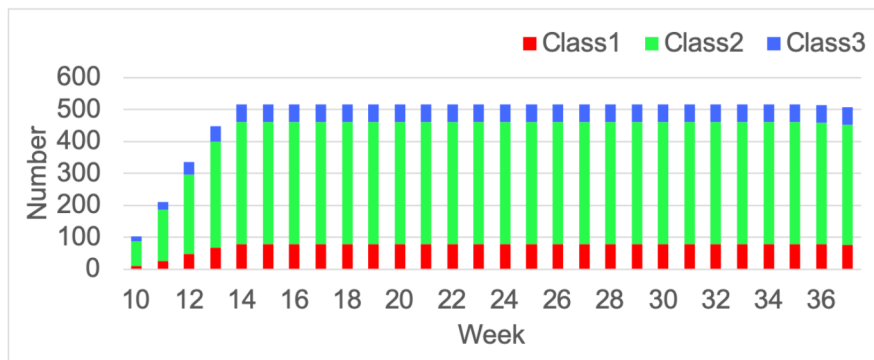

**Figure S8. Mean trajectories of identified classes for maternal weight gain.** a. Mean trajectory of identified velocity trajectory classes for maternal weight gain. b. Sample number each week shown in a stacked bar chart. Color codes identified class indicated in the top.

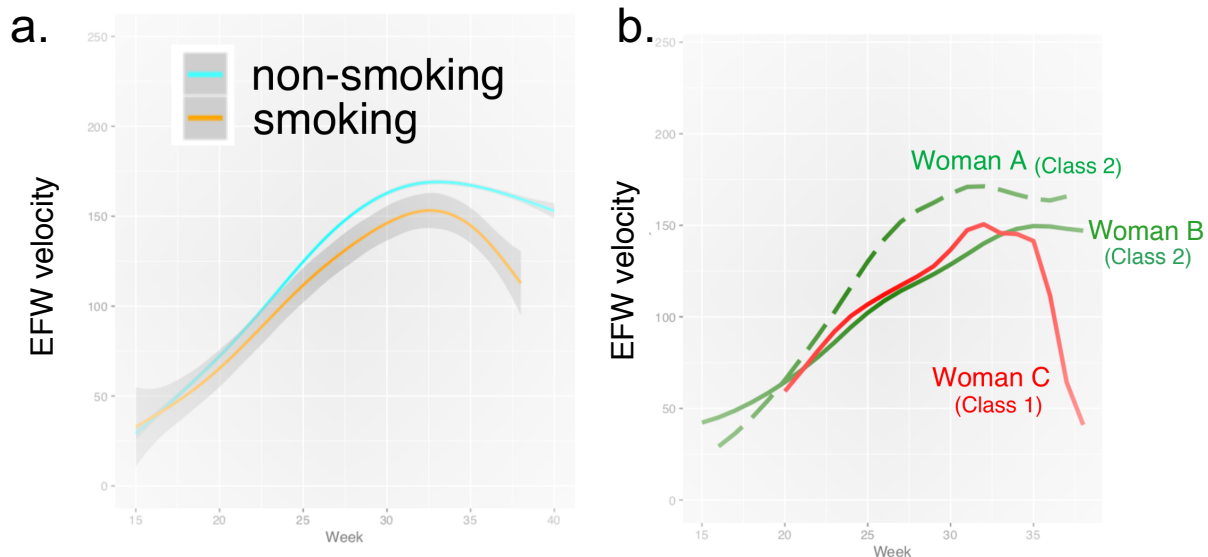

c.

| Woman | Week of delivery | Maternal characteristics |         |                                        | Child characteristics |                  |              |                |                |
|-------|------------------|--------------------------|---------|----------------------------------------|-----------------------|------------------|--------------|----------------|----------------|
|       |                  | GDM or No                | Age (y) | Pre-pregnancy BMI (kg/m <sup>2</sup> ) | EFW z-score at week20 | Birth weight (g) | BWGA z-score | Ponderal index | NICU admission |
| A     | 38.8             | GDM                      | 33      | 31.2                                   | -1.00                 | 3380             | 1.39         | 2.55           | Yes            |
| B     | 39.4             | No                       | 29      | 15.8                                   | -0.15                 | 2866             | -0.12        | 2.51           | No             |
| C     | 39               | No                       | 30      | 18.2                                   | -0.13                 | 2192             | -2.40        | 1.86           | Yes            |

**Figure S9. Preliminary investigation for the involvement of velocity variation in birth outcome.**

Among term vaginal deliveries (n = 495), three women smoked during gestation. a. EFW velocity of smoking and non-smoking groups. b. EFW velocity curve of each woman in the smoking group. c. The characteristics of women and their children in the smoking group. GDM, gestational diabetes mellitus; BMI, body mass index; EFW, estimated fetal weight; BWGA, birth weight for gestational age; NICU, Neonatal intensive care unit
